# Supplementary material
Source: PubMed Central journal article supplement (PMC1914090)
Supplement: 7601742s1.pdf [file 7601742s1.pdf]

S1)

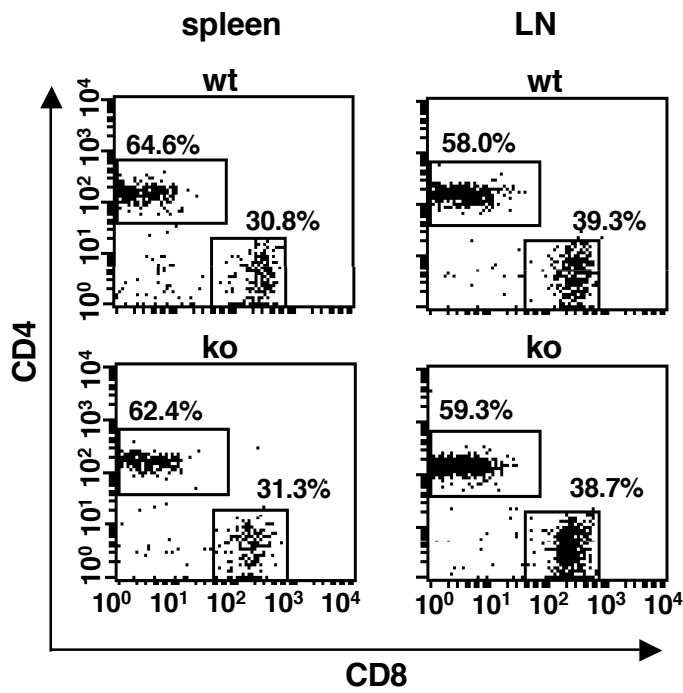

Supplemental Figure 1

S2)

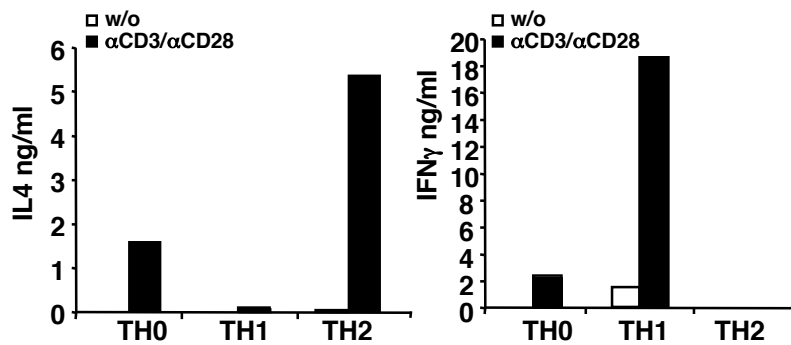

Supplemental Figure 2

S3)

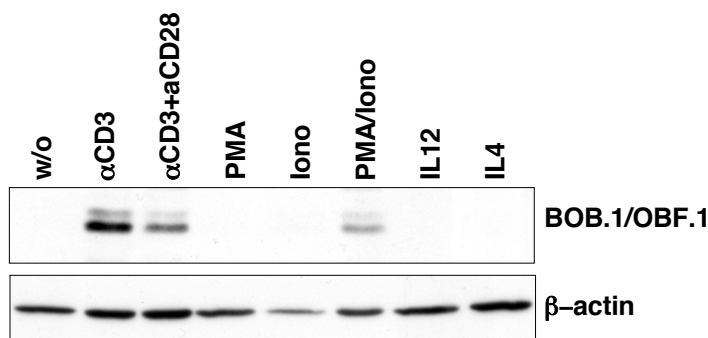

Supplemental Figure 3

S4)

proliferation after L.m. infection and restimulation of LN cells adjusted for CD4<sup>+</sup> cell numbers

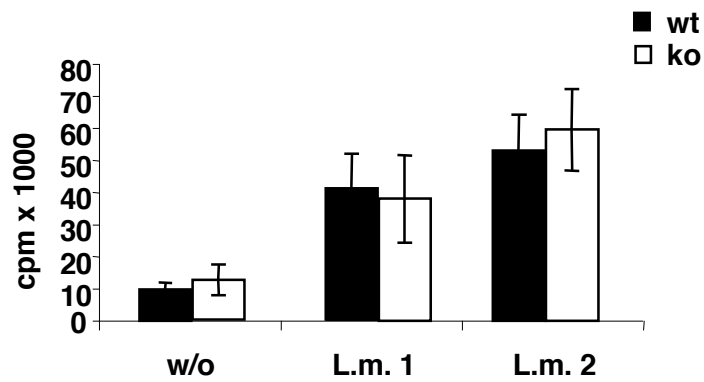

S5)

Supplemental Figure 4

cell numbers of lymphocyte populations in draining lymph nodes of infected animals

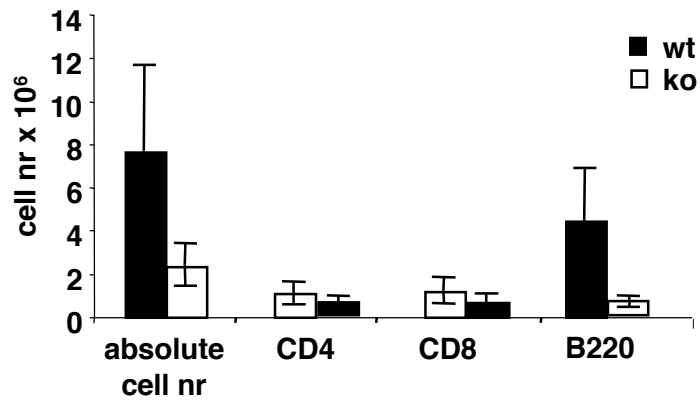

Supplemental Figure 5

S6A)

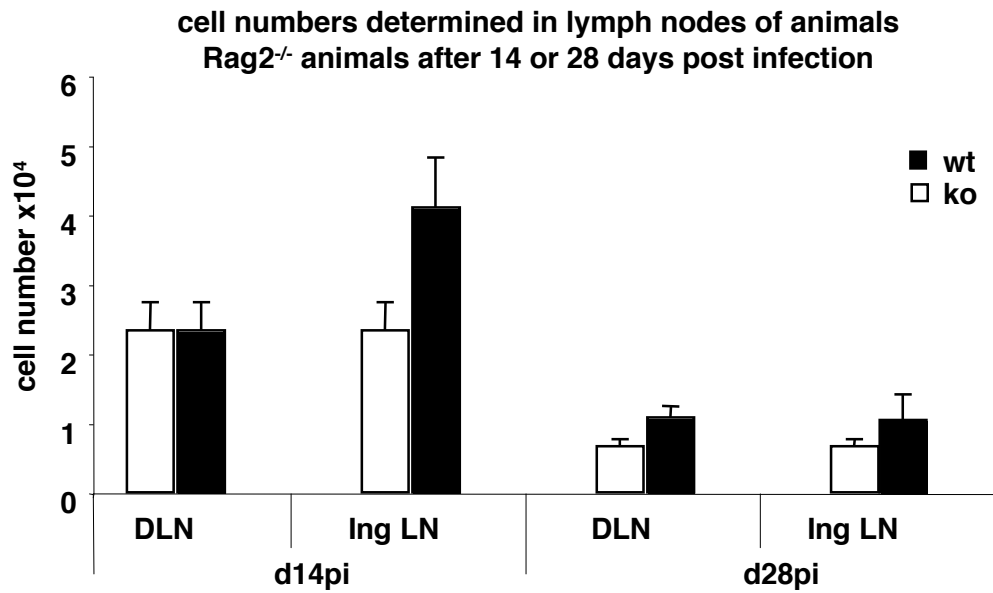

S6B)

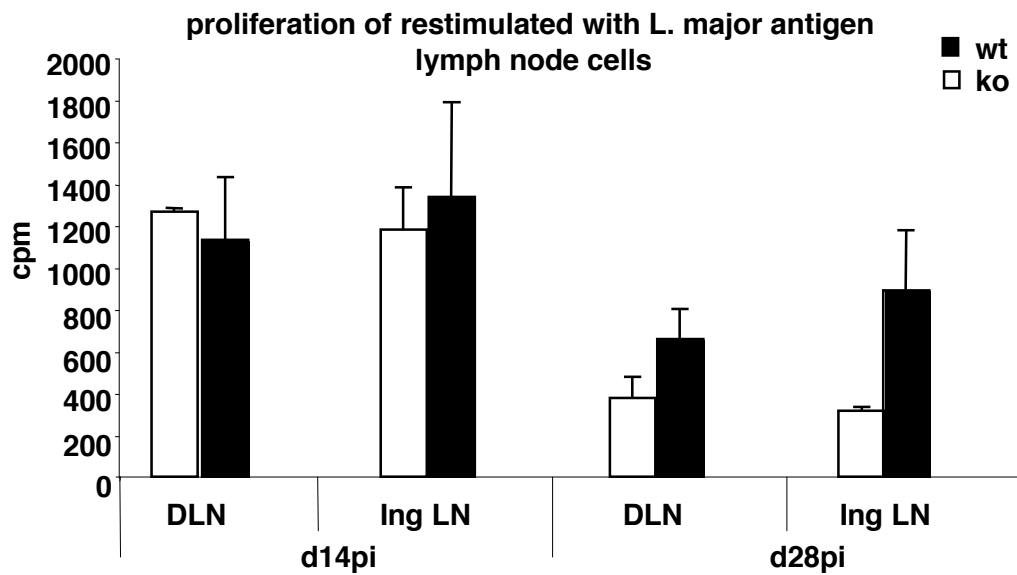

S7A)

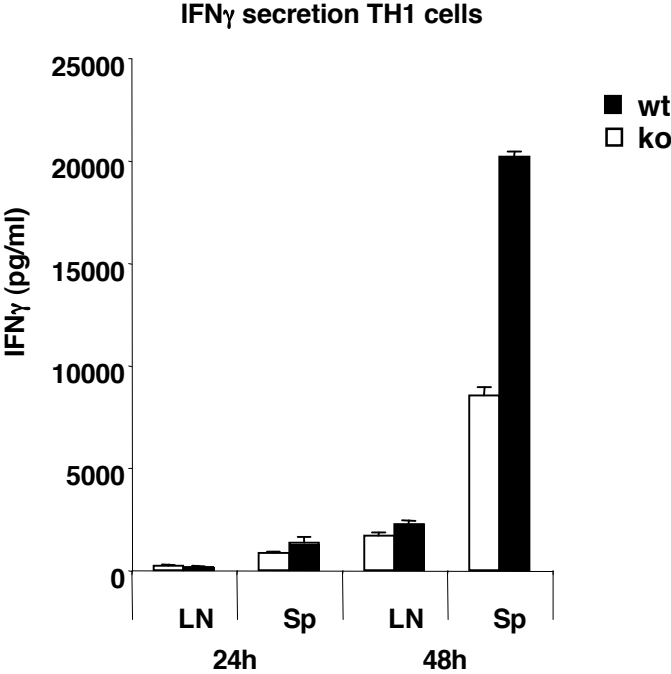

S7B)

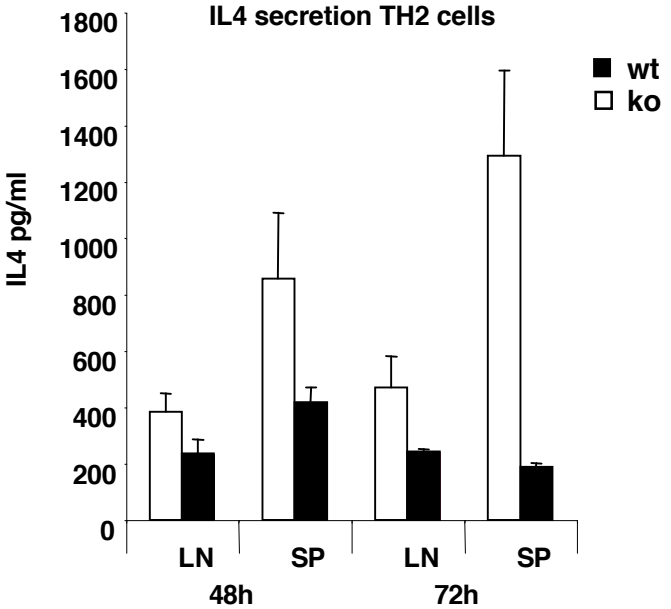

Supplemental Figure 7

S8)

TTTTATTAATGGAGGAAC TAGATGATTTTTATTTACCTATGTGGTCTGCC  
TTTTATTAATGAGGCTACTAGATCATTAAATTTACCTGTGTGGCTTGTA

M1

TTTTCTTCTTTCTGGGCA-CGTTGACCCTGAGTGATTTG-----TAGT  
TTGTATTTCTACTGGGCAGTGCTGATCTAGAGCAATTTGAAACTTGTGGT

AGGTATTTTACTAATCACCTCCATTGAAGGGCTTCCTCACCACATTGGCT  
AGATATTTTACTAACCAACTCTGATGAAGGACTTCCTCACCAAATTGTTC

TTTTAACCATACCCTTTCTTGCTTTTCTGGTCATTTGCAA GAAAAGTTT  
TTTTAACCGCATTCTTTCTTGCTTT-CTGGTCATTTGCAA GAAAAATTT

M2

GAAAAGGCTTCCCCATTGCATGGTTTGAGAAGCCCAAGAGTTTCTCAT  
TAAAAGGCTGCCCC-----TTTGTAAAG-----

GGTTTGAGAAGCCCAAGAGTTTCTTTTATTTCAGCCGTCCCCAACCAAA  
-GTTTGAGAGGCCCTAGAATTTCTGTTT--TTCATTGTTCCCAACCACAA

M3

ACAAAGGCTCCCTGTGCTGTGCTCTGTGGATGAGAAATTCACATT--ACA  
GCAAATGATC-----AATGTGCTTTGTGAATGAAGAGTCAACATTTTACC

AGGGCAAAAAGGGGGAGACGTAAAAGCAATTTCCAGCCCCCACCCCAAT  
AGGGCGAAGTGGGG-AGGTACAAAAA-AATTTCCAGTCC-----TTGAAT

M4

GGTGTGAAGTAAAAGTGCTTTTCAGAGAATCCACAGAATGGCACAGGTG  
GGTGTGAAGTAAAAGTGCCTTCAAAGAATCCACCAGAATGGCACAGGTG

GGCACAGCGGGGCTGTCTCATCGTCAGAGAGCCCAAGGAGTCGAAAGGAA  
GGCATAATGGGTCTGTCTCATCGTCAAAGGACCCAAAGGAGTCTAAAGGAA

ACTCTAAC-----ATGCCACAAAACCATAGCTGT-ATGCAAA  
ACTCTAACTACAACACCCAAATGCCACAAAACCTTAGTTATTAATACAAA

M5

GTAACCTTAGCTCCCCCACCTATCTGTCCACATCTTAAAAAAAAAAAAAAC  
CTATCAT-----CCCTGCCTATCTGTCCACATCTC---A-----

CAAAAAAAAAACTTGTGAAAATACGTAATCCCGAGGAGCCTTCGATCAGGT  
TCTTAAAAAAACTTGTGAAAATACGTAATCCTCAGGAGACTTCAATTAGGT

TATA-Box

ATAAA-ACTGGAAGCCAGAG-AGGTGCAGGCTATAGCTGCCATCGGCTGA  
ATAAATACCAGCAGCCAGAGGAGGTGCAGCACATTGTTCTGATCATCTGA

C-----CTAGAGAAGACACATCAGCTGA-TCCTTTGGACCCTCTGA  
AGATCAGCTATTAGAAGAGAAAGATCAGTTAAGTCCTTTGGACCTGATCA

-CTTGAGACAGAAGTTCTGGGCTTCTCCTCCTGCGCCTAGCTCT----G  
GCTTGATACAAGAACTACTGATTTCAACTTCTTTGGCTTAATTCTCTCGG

AGACAATGAAC murine IFN $\gamma$  promoter  
AAACGATGAAA human IFN $\gamma$  promoter

ATG
